# Supplementary material
Source: PubMed Central journal article supplement (PMC3035098)

gastrula

day 2

day 4

*sfrp1/5*

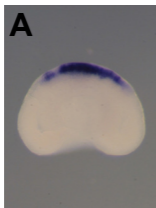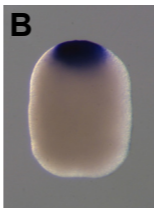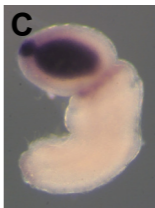

*engrailed*

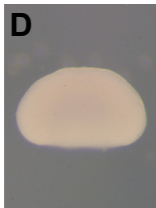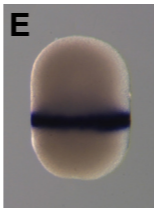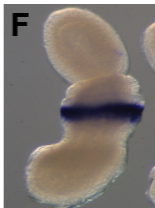

*hox9/10*

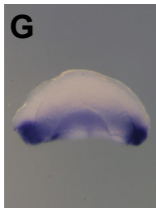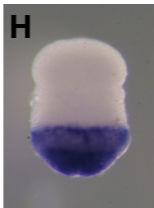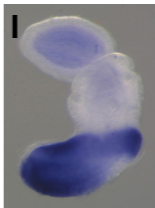

*foxA*

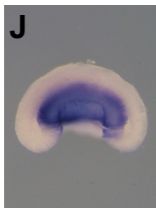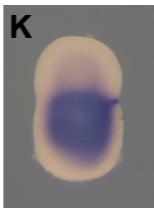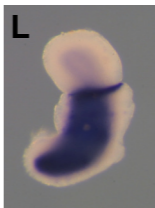

Supplement: supp_138.5.959_DEV059493FigS1.pdf [file supp_138.5.959_DEV059493FigS1.pdf]

*sfrp1/5*

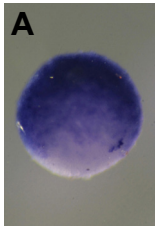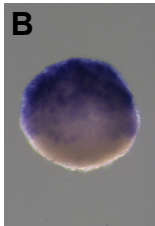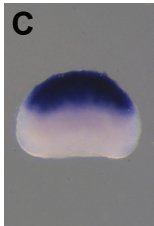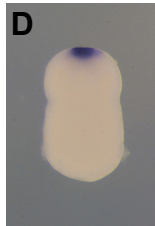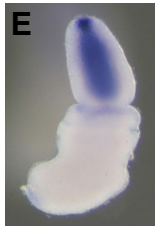

*foxQ2-1*

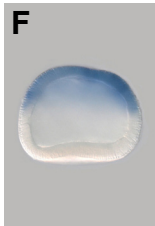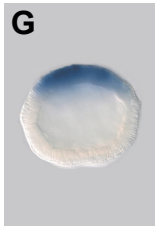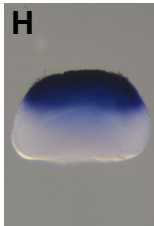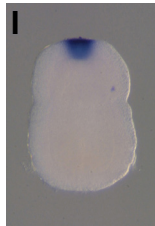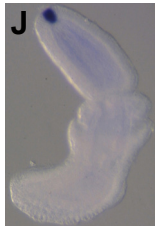

Supplement: supp_138.5.959_DEV059493FigS2.pdf [file supp_138.5.959_DEV059493FigS2.pdf]
